# Supplementary material for: Synthesis of hierarchical porous TiNb2O7nanotubes with controllable porosity and their application in high power Li-ion batteries
Source: Royal Society of Chemistry journal article supplement (doi:10.1039/c7ta00597k), 2017-01-01
Supplement: c7ta00597k1.pdf [file c7ta00597k1.pdf]

## Supporting Information

### **Synthesis of Hierarchically Porous $\text{TiNb}_2\text{O}_7$ Nanotubes with Controllable Porosity and Their Application in High Power Li-Ion Batteries**

*Hyunjung Park<sup>1</sup>, DongHyeok Shin<sup>1</sup>, Taeseup Song<sup>2\*</sup>, Won Il Park<sup>3\*</sup>, and Ungyu Paik<sup>1\*</sup>*

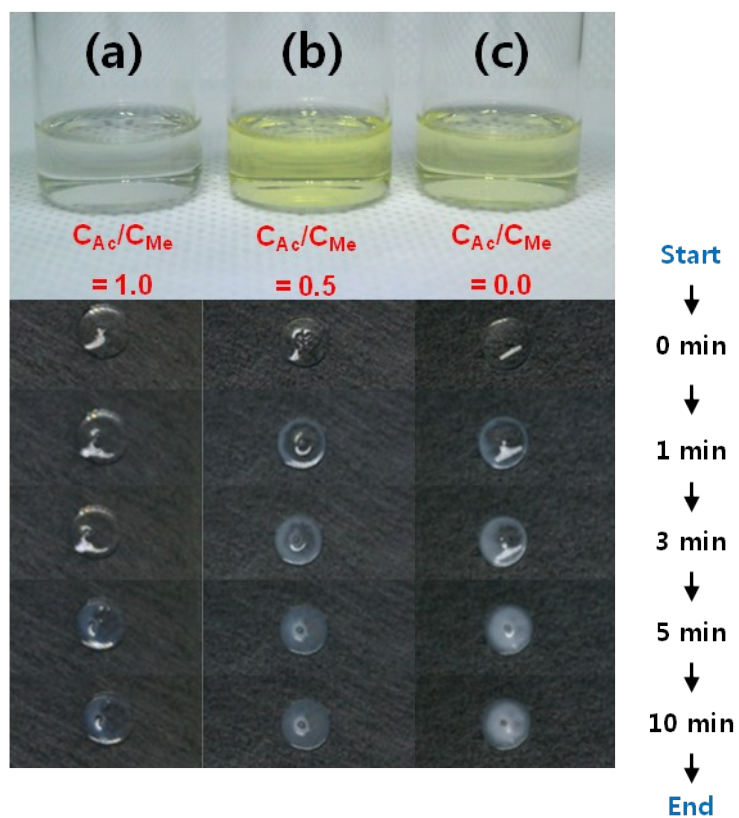

**Fig. S1** Observation of a hydrolysis degree on three types of mixture solutions prepared with different molar ratios of acetic acid to Ti(IV)/Nb(V) precursors in ethanol. (a)  $C_{Ac}/C_{Me} = 0$ , (b)  $C_{Ac}/C_{Me} \approx 0.5$ , and (c)  $C_{Ac}/C_{Me} \approx 1$ ; the molar concentrations of metal precursors in the solutions are fixed at 0.5 M.

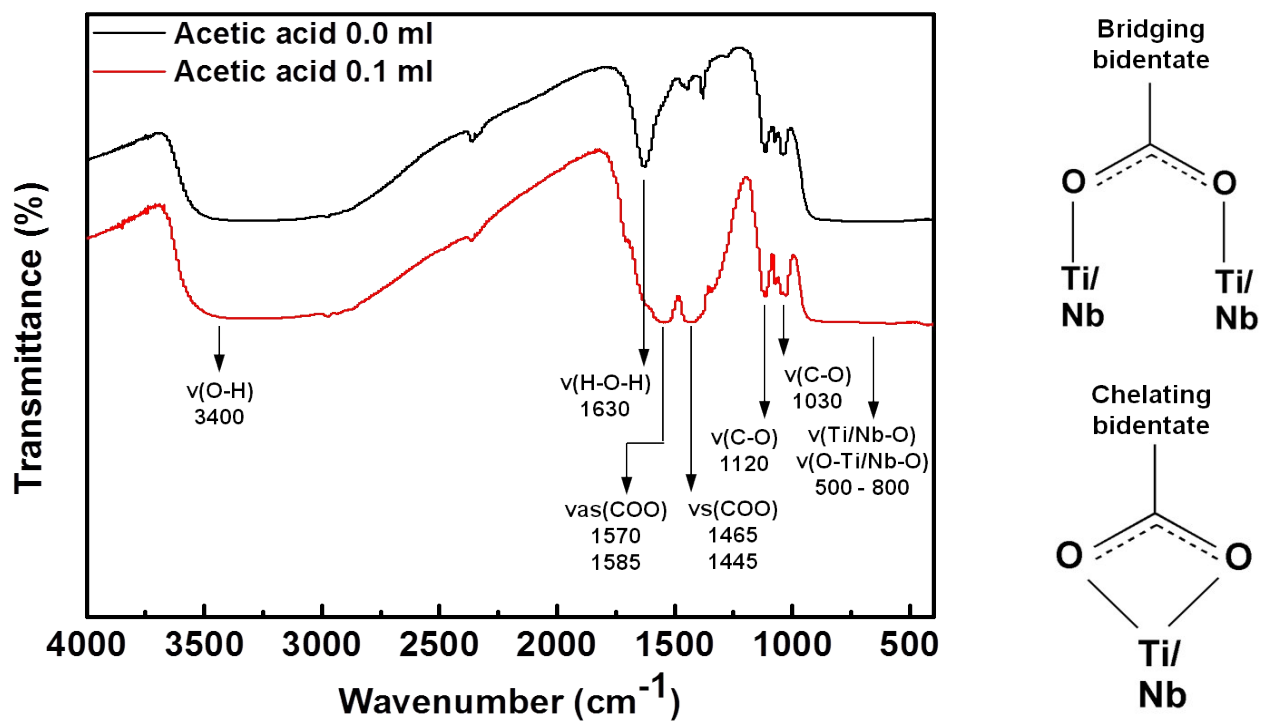

**Fig. S2** FTIR spectra of powders prepared by Ti (IV)/Nb (V) alkoxide precursors and acetic acid after drying at 100 °C in air.

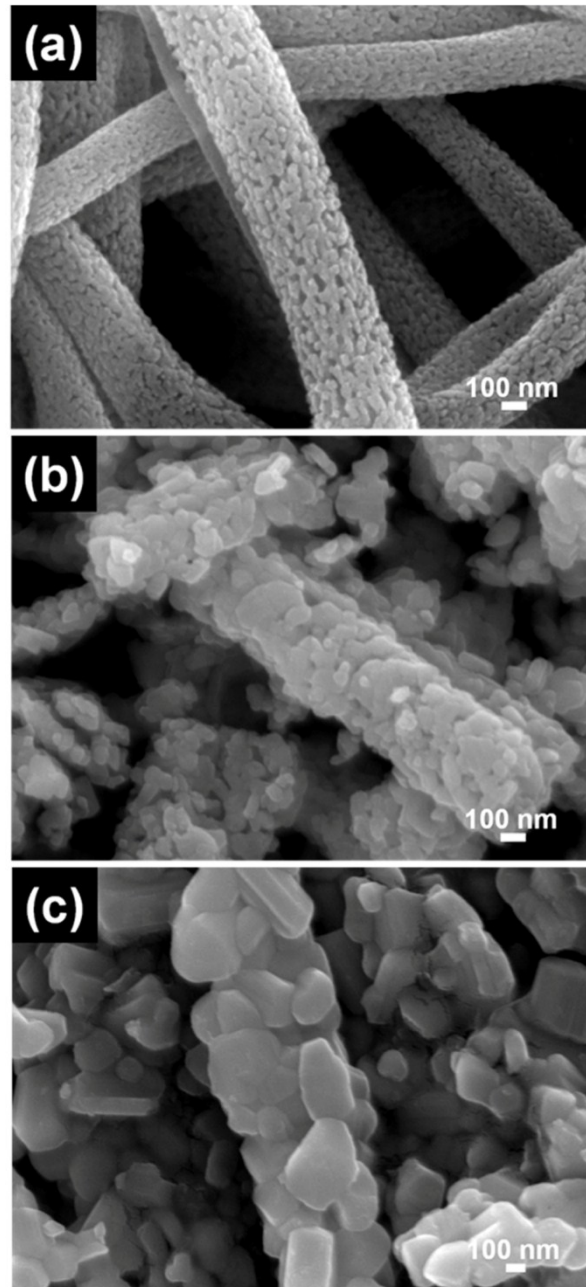

**Fig. S3** SEM images of TNO NTs-2 calcined at different temperatures: (a) 700 °C, (b) 850 °C, and (c) 1000 °C.

| Sample    | 2theta | FWHM | $\beta$ | Crystallite size<br>; D (nm) | mean<br>(nm) |
|-----------|--------|------|---------|------------------------------|--------------|
| TNO NTs-1 | 39.10  | 1.08 | 0.019   | 7.7                          | 7.8          |
|           | 47.65  | 1.75 | 0.019   | 7.9                          |              |
| TNO NTs-2 | 39.00  | 0.55 | 0.010   | 16.3                         | 16.4         |
|           | 47.70  | 0.52 | 0.009   | 16.5                         |              |
| TNO NTs-3 | 39.02  | 0.59 | 0.010   | 14.1                         | 14.9         |
|           | 47.95  | 0.55 | 0.009   | 15.6                         |              |

**Table 1.** Calculation of mean particle sizes of TNO NTs based on Scherrer equation.

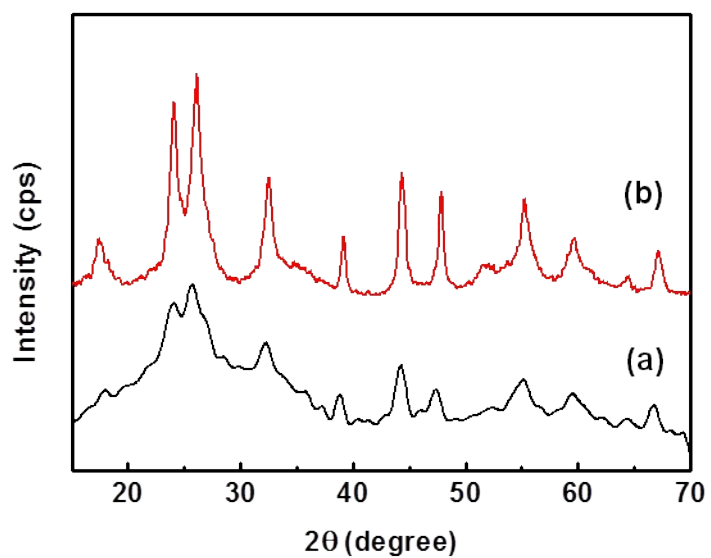

**Fig. S4** XRD peak patterns of TNO NTs-1 calcined at different temperatures in air for 2h: (a) 700 °C and (b) 750 °C

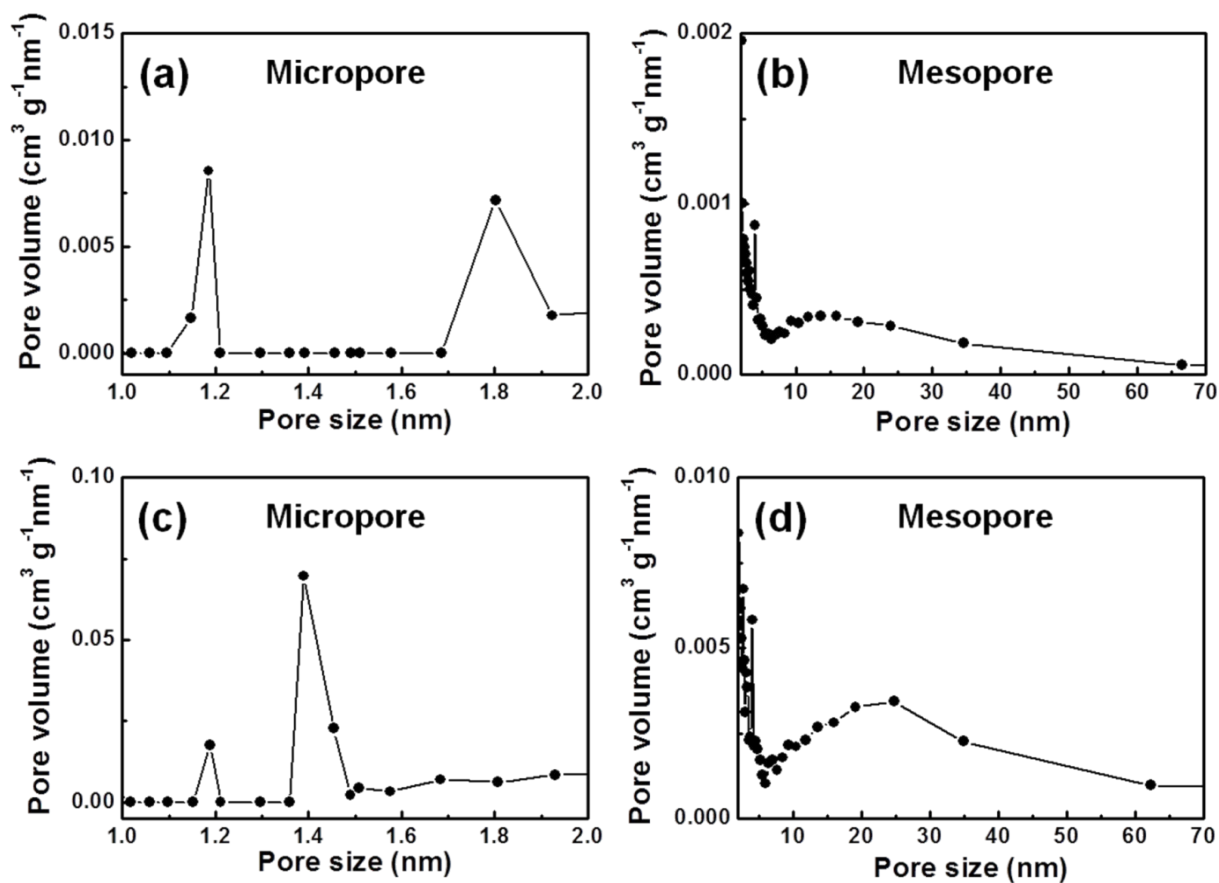

**Fig. S5** Pore size distribution in the ranges of micro ( $d < 2$  nm) and mesopore ( $2 \text{ nm} < d < 50$  nm): (a) and (b) TNO NTs-2, and (c) and (d) TNO NTs-3.

| Material                         | Morphology        | Template                                         | Calcination temperature (°C) | Surface area (m <sup>2</sup> g <sup>-1</sup> ) | Reference number |
|----------------------------------|-------------------|--------------------------------------------------|------------------------------|------------------------------------------------|------------------|
| TiNb <sub>2</sub> O <sub>7</sub> | Particles         | F127                                             | 700                          | 85                                             | 40               |
| TiO <sub>2</sub>                 | Nanofibers        | PVP (M <sub>w</sub> ≈ 1,300,000), F127           | 540                          | 90                                             | 50               |
| TiO <sub>2</sub>                 | Nanofibers        | P123                                             | 600                          | 32                                             | 51               |
| TiO <sub>2</sub>                 | Nanofibers        | PVP (M <sub>w</sub> ≈ 1,300,000), ZnO            | 500                          | 149                                            | 52               |
| TiO <sub>2</sub>                 | Hollow nanofibers | PMMA (M <sub>w</sub> ≈ 120,000), CTAB            | 500                          | 59                                             | 53               |
| TiO <sub>2</sub>                 | Nanofibers        | F127                                             | 450                          | 112                                            | 54               |
| TiO <sub>2</sub>                 | Nanofibers        | PVP (M <sub>w</sub> ≈ 1,300,000), Carbon spheres | 500                          | 33                                             | 55               |

**Table 2.** Comparison of titanium based metal oxides on their surface area prepared with different kinds of templates, chemicals, and calcination temperatures.



| Compound                                                                  | Morphology                      | 1st discharge capacity (mAh g <sup>-1</sup> ) | Rate capability (mAh g <sup>-1</sup> ) | Capacity after cycles (mAh g <sup>-1</sup> ) | Cycle number | Remarks                                 | Reference |
|---------------------------------------------------------------------------|---------------------------------|-----------------------------------------------|----------------------------------------|----------------------------------------------|--------------|-----------------------------------------|-----------|
| Carbon/<br>TiNb <sub>2</sub> O <sub>7</sub>                               | Microparticles                  | 285 @ 0.1C                                    | ~ 130 @ 2C                             | -                                            | -            | -                                       | 19        |
| TiNb <sub>2</sub> O <sub>7</sub>                                          | Nanoparticles                   | 213 @ 1C                                      | ~ 76 @ 10C                             | 175                                          | 300 @ 1C     | Particle size: ~ 10 nm                  | 21        |
| TiNb <sub>2</sub> O <sub>7</sub>                                          | Hierarchical microspheres       | ~ 300 @ 0.1C                                  | ~ 100 @ 20C                            | 115                                          | 500 @ 10C    | Particle size: 2 - 3 μm                 | 22        |
| TiNb <sub>2</sub> O <sub>7</sub>                                          | Nanofibers                      | ~ 284 @ 0.1C                                  | ~ 60 @ 20C                             | 250                                          | 50 @ 1C      | Diameter: 500 nm, Particle size: 100 nm | 23        |
| TiNb <sub>2</sub> O <sub>7</sub>                                          | Porous nanofibers               | ~ 284 @ 1C                                    | ~ 170 @ 100C                           | 170                                          | 500 @ 5C     | Diameter: 110 nm, Particle size: 10 nm  | 25        |
| TiNb <sub>2</sub> O <sub>7</sub> /<br>Ti <sub>1-x</sub> Nb <sub>x</sub> N | Hierarchical microspheres       | ~ 265 @ 0.1C                                  | ~ 143 @ 100C                           | 182                                          | 1000 @ 5C    | Particle size: 1.2 μm                   | 26        |
| TiNb <sub>2</sub> O <sub>7</sub>                                          | Porous particles                | ~ 281 @ 0.1C                                  | ~ 125 @ 50C                            | 200                                          | 1000 @ 5C    | Particle size: 20 - 30 nm               | 27        |
| TiNb <sub>2</sub> O <sub>7</sub>                                          | Nanotubes                       | ~ 265 @ 0.1C                                  | ~ 85 @ 100C                            | 175                                          | 700 @ 1C     | TNO NTs-1                               | This work |
| TiNb <sub>2</sub> O <sub>7</sub>                                          | Porous nanotubes                | ~ 281 @ 0.1C                                  | ~ 115 @ 100C                           | 188                                          | 700 @ 1C     | TNO NTs-2                               | This work |
| TiNb <sub>2</sub> O <sub>7</sub>                                          | Hierarchically porous nanotubes | ~ 294 @ 0.1C                                  | ~ 180 @ 100C                           | 210                                          | 700 @ 1C     | TNO NTs-3                               | This work |

**Table 3.** Comparison of the electrochemical performances of TiNb<sub>2</sub>O<sub>7</sub> previously reported.

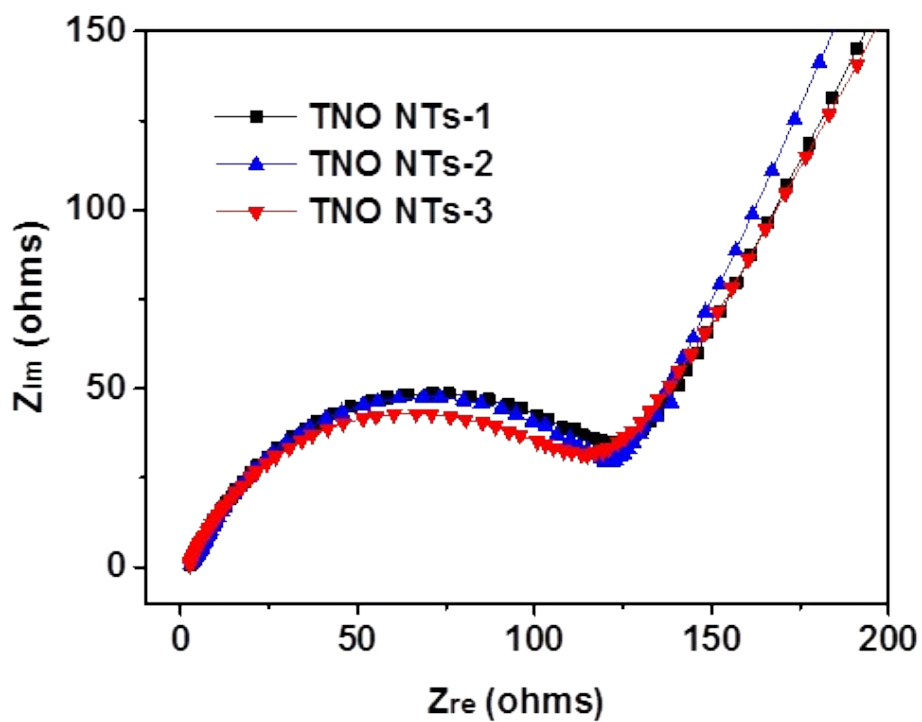

**Fig. S6** Electrochemical impedance spectra of TNO NTs-1/2/3 electrodes obtained by sinusoidal wave with an amplitude of 10.0 mV within the frequency range from 200 kHz to 0.1 Hz.
